# Supplementary material
Source: MDPI journal article supplement (https://www.mdpi.com/2077-0472/13/1/27)
Supplement: s1 [file s1]

Supplementary Information (SI)

Distribution of genetic diversity in *Beta patula* Aiton populations from Madeira Archipelago, Portugal

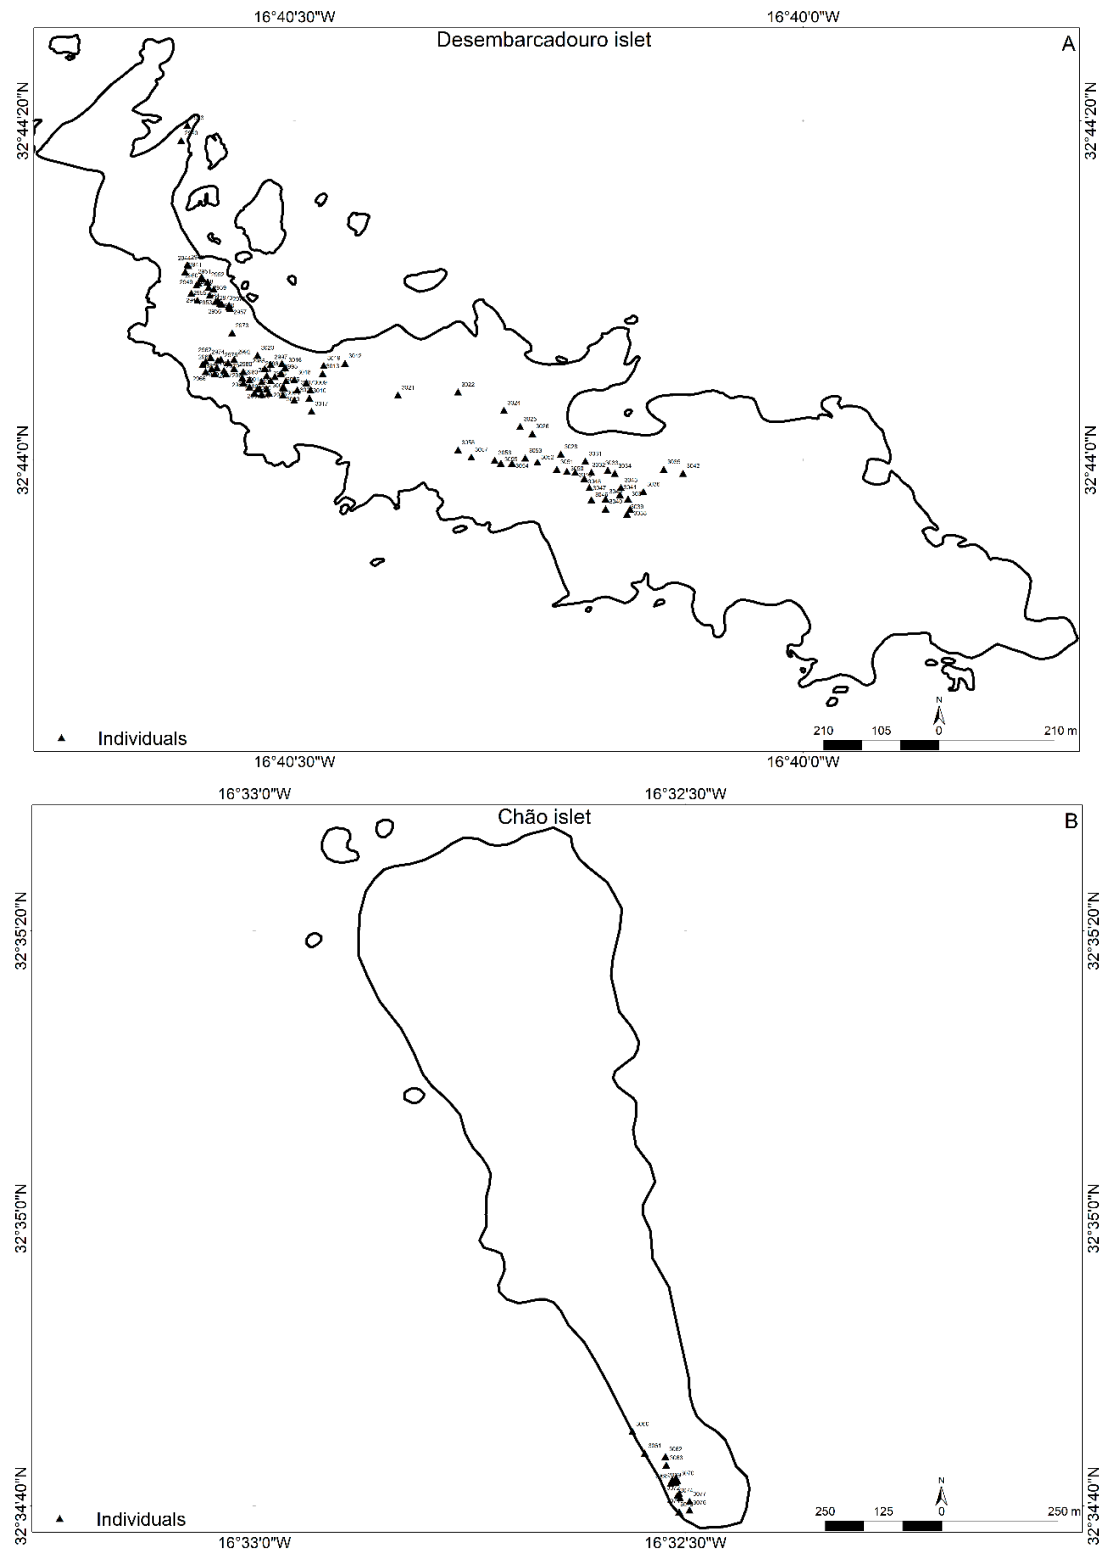

Supplementary Information (SI) – Distribution maps of individuals from Desembarcadouro islet (A) and Chão islet (B).
